# Supplementary material
Source: PubMed Central journal article supplement (PMC10629720)
Supplement: 0-rev2_supplementary_materials_full_cwad066.pdf [file 0-rev2_supplementary_materials_full_cwad066.pdf]

# Supplementary Materials For

## GalNAc-T isozyme surface charge governs charge substrate preferences to modulate mucin type O-glycosylation

**Collin Ballard<sup>2</sup>, Miya Paserba<sup>2</sup>, Earnest James Paul Daniel<sup>2,3</sup>, Ramon Hurtado-Guerrero<sup>4,5,6,7</sup>, Thomas A Gerken<sup>2,1</sup>**

<sup>2</sup>Department of Biochemistry, Case Western Reserve University, Cleveland, OH 44106, USA,

<sup>3</sup>present address Department of Pathology and Laboratory Medicine, Children's Hospital of Philadelphia, Philadelphia, Pennsylvania, USA, <sup>4</sup>BIFI and Laboratorio de Microscopías Avanzada (LMA), University of Zaragoza, Mariano Esquillor s/n, Campus Rio Ebro, Edificio I+D, Zaragoza, 50018, Spain, <sup>5</sup>Department of Cellular and Molecular Medicine, <sup>6</sup>Department of Dentistry, Faculty of Health Sciences, Copenhagen Center for Glycomics (CCG), University of Copenhagen, Copenhagen N DK-2200, Denmark, <sup>7</sup>Fundación ARAID, Zaragoza, 50018, Spain

<sup>1</sup>To whom correspondence should be addressed: Tel: 216-368-4556; Fax: 216-368-4223; e-mail: [txg2@cwru.edu](mailto:txg2@cwru.edu)

### **Supplementary Figures:**

Supplementary Figure S1: Template Structures and peptides used for homology modeling of the GalNAc-Ts

Supplementary Figure S2: GalNAc-T surface electrostatic potentials for all template models

Supplementary Figure S3: GalNAc-T surface electrostatic potentials for all template models

Supplementary Figure S4: Electrostatics of the LA repeat regions of the LDL receptor reveal defined regions of negative flanking charge.

Supplementary Figure S5: PGANT surface electrostatic potentials for all template models

Supplementary Figure S6: Structures showing *in vivo* GalNAc-T N- & O-glycosylation sites.

Supplementary Figure S7: Comparison of GalNAc-T11 and PGANT35A Specificity

Supplementary Figure S8: Comparison of GalNAc-T3 and GalNAc-T6 Specificity

## **Supplementary Tables**

Supplementary Table SI: Sequences of peptides bound to GalNAc-Ts in the presence of  $Mn^{2+}$  and UDP

Supplementary Table SII: In vivo GalNAc-T N-glycosylation sites

Supplementary Table SIII: In vivo GalNAc-T O-glycosylation sites

Supplementary Table SIV: Previously unpublished enhancement values (EV) for hGalNAc-T11, PGANT35A (dT1) and hGalNAc-T6.

## **Supplementary Movies (as separate files)**

Movies of the 250ns MD simulations for tgGalNAc-T3, hGalNAc-T12, and T2 bounds to charged peptides. Charged peptide residues are color coded blue for the positive Arg residues, red for the negative Asp residues, and white/green for the neutral Gly and Ala residues.

**Supplementary Movie 1:** 250nSec MD trajectory of the most active RR peptide bound to tgGalNAc-T3 (PDB 6S24)

**Supplementary Movie 2:** 250nSec MD trajectory of the least active DD peptide bound to tgGalNAc-T3 (PDB 6S24)

**Supplementary Movie 3:** 250nSec MD trajectory of the most active DR peptide bound to tgGalNAc-T12 (PDB 6XPU)

**Supplementary Movie 4:** 250nSec MD trajectory of the least active RD peptide bound to tgGalNAc-T12 (PDB 6XPU)

**Supplementary Movie 5:** 250nSec MD trajectory of the most active DD peptide bound to tgGalNAc-T2 (PDB5AJP)

**Supplementary Movie 6:** 250nSec MD trajectory of intermediately active GG peptide bound to tgGalNAc-T2 (PDB5AJP)

**Supplementary Movie 7:** 250nSec MD trajectory of least active RR peptide bound to tgGalNAc-T2 (PDB5AJP)

### **Supplementary Figure S1:**

GalNAc-T template structures used for homology modeling of the GalNAc-Ts studied in this work (see Materials and Methods). A) Template structures, with the bound peptides used to model the GalNAc-Ts left-compact lectin structure (tgGalNAc-T3, PDB: 6S24), the extended lectin structure (hGalNAc-T2, PDB: 2FFU) and the right compact lectin structure (hGalNAc-T2 PDB: 5AJP). B) Sequences of the bound peptides in part A that were aligned onto each of our GalNAc-T homology structures. T\* represents Thr-O-GalNAc.

### **Supplementary Figure S2:**

Electrostatic surface potentials for all GalNAc-Ts studied. Each transferase was homology modeled against the three lectin domain orientations given in **Supplementary Figure S1** and are listed in the order given in **Figure 2**. The left column represents the lectin left compact structure (tgGalNAc-T3 PDB 6S24), middle column, extended lectin orientation (hGalNAc-T2 PDB: 2FFU), and right column, lectin right compact orientation (hGalNAc-T2 PDB: 5AJP). Bound peptides were aligned around the T/S-PXP sequence motif in each structure after superimposing the catalytic domains with bound peptides in PyMOL.

### **Supplementary Figure S3:**

Electrostatic surface potentials for all GalNAc-Ts studied. Each transferase was homology modeled against the three lectin domain orientations given in **Supplementary Figure S1** and are listed in the order given in **Figure 3**. The left column represents the lectin left compact structure (tgGalNAc-T3 PDB 6S24), middle column, extended lectin orientation (human GalNAc-T2 PDB: 2FFU), and right column, lectin right compact orientation (human GalNAc-T2 PDB:

5AJP). Bound peptides were aligned around the T/S-PXP sequence motif in each structure after superimposing the catalytic domains with bound peptides in PyMOL.

#### **Supplementary Figure S4:**

Electrostatics of the LA repeat regions of the LDL receptor reveal defined regions of negative flanking charge. A) The electrostatic surface potential (blue) of GalNAc-T11. B) The location of the Thr residues of the low-density-lipoprotein receptor (LDLR) glycosylated by this isozyme. C) Electrostatic distributions of the LDLR surrounding these residues (black circles) showing areas of highly negative flanking charge (red) likely to enhance GalNAc-T11 binding (C).

#### **Supplementary Figure S5:**

Homology Models and electrostatic surface potentials of the PGANT based on the templates in **Supplementary Figure S1**. Left column *tg*GalNAc-T3 (PDB 6S24), second column *h*GalNAc-T2 (PDB: 2FFU), and third column *h*GalNAc-T2 (PDB: 5AJP) templates respectfully. The rightmost column gives the electrostatic surface potentials of the *h*GalNAc-T orthologues that were studied showing partial conservation of surface charge.

#### **Supplementary Figure S6:**

*In-Vivo* reported O-glycosylation sites and reported and predicted N-glycosylation sites for the studied GalNAc-Ts. Shown are the structures of *h*GalNAc-T1, -T3, -T4, -T5, -T6, -T7, -T11, -T12, -T13 & -T16 and *tg*GalNAc-T3 showing reported O-glycosylation sites (orange), reported (red) and/or predicted (blue) N-glycosylation sites, where the Thr or Asn residues are shown as spheres (see **Supplemental Table SII and SIII**). The shown bound peptide structures (green, blue and yellow), <sup>2+</sup>Mn (purple) and UDP (green) were obtained from the homology model templates as described **Figure 2**. The N-terminal stem regions have been omitted in the

structures while the structures are shown to maximize visualizing the glycosites relative to the peptide binding site. Note the C-terminal Thr554 O-glycosite identified for GalNAc-T1 is absent in the PDB 6S24 template structure.

**Supplementary Figure S7:**

Comparison of the peptide substrate specificity of hGalNAc-T11 and its fly orthologue PGANT35A. A) Bar graph plot comparing hydrophobic residue enhancement values (EV) of hGalNAc-T11 (T11) and PGANT35A (T35A). B) Bar graph plot comparing hydrophilic residue enhancement values (EV) of hGalNAc-T11 (T11) and PGANT35A (T35A). C) Scatter plots of EVs for hGalNAc-T11 and PGANT35A showing their relative correlation. EV values are given in **Supplementary Table SIV**.

**Supplementary Figure S8**

Comparison of the peptide substrate specificity of subfamily Ic members hGalNAc-T3 and T6. A) Bar graph plot comparing hydrophobic residue enhancement values (EV) of hGalNAc-T3 (T3) and hGalNAc-T6 (T6). B) Bar graph plot comparing hydrophilic residue enhancement values (EV) of hGalNAc-T3 (T3) and hGalNAc-T6 (T6). C) Scatter plots of EVs for hGalNAc-T3 and T6 showing their relative correlation. EV values for hGalNAc-T6 are given in **Supplementary Table SIV**, EV values for hGalNAc-T3 have previously been reported (Gerken et al 2011).

## Supplementary Figure S1: Template Structures and peptides used for homology modeling of the GalNAc-Ts Studied

### A) PDB Structure Templates from X-Ray Crystallography

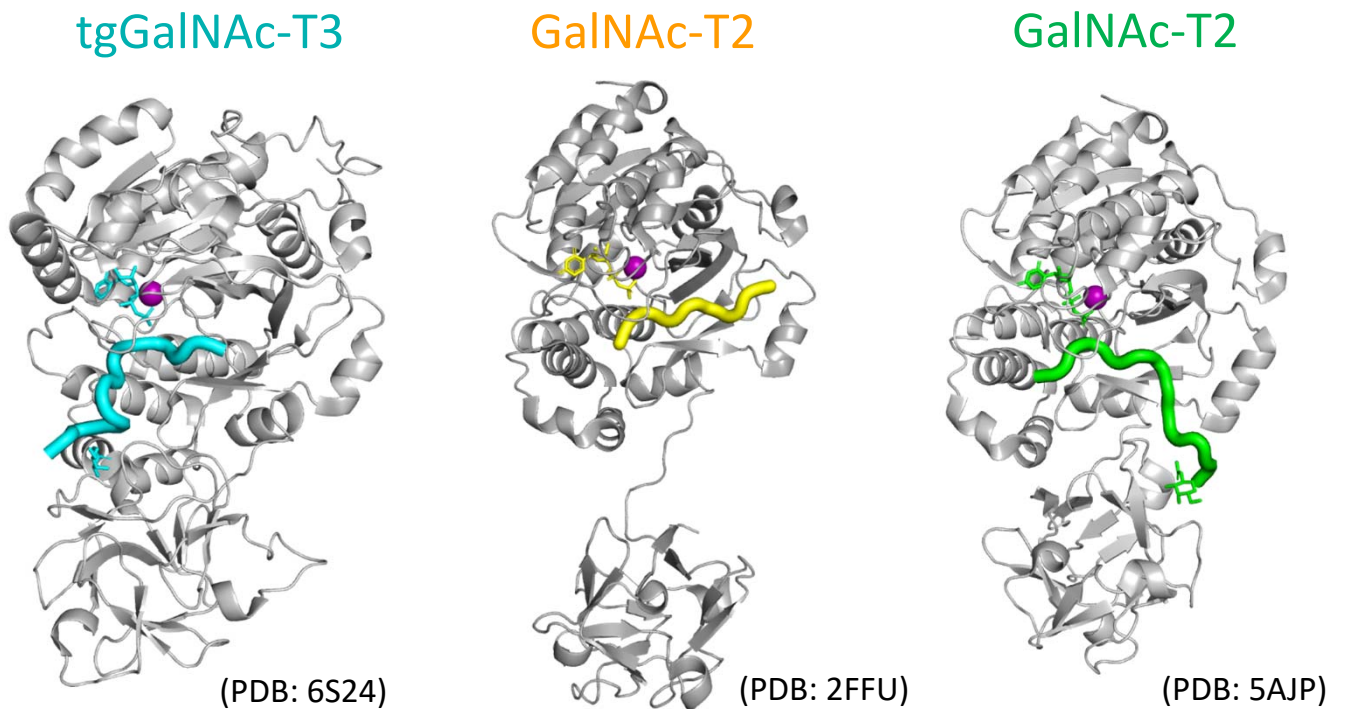

### B) Bound Substrate Sequences

**P3: GAT\*GAGAGAGTTPGPG (PDB: 6S24)**

**EA2: PTTDSTTPAPTTK (PDB: 2FFU)**

**AC13: GTTPSPVPTTSTT\*SAP (PDB: 5AJP)**

# Supplementary Figure S2: Electrostatic Surface Potentials for the GalNAc-Ts in Figure 2

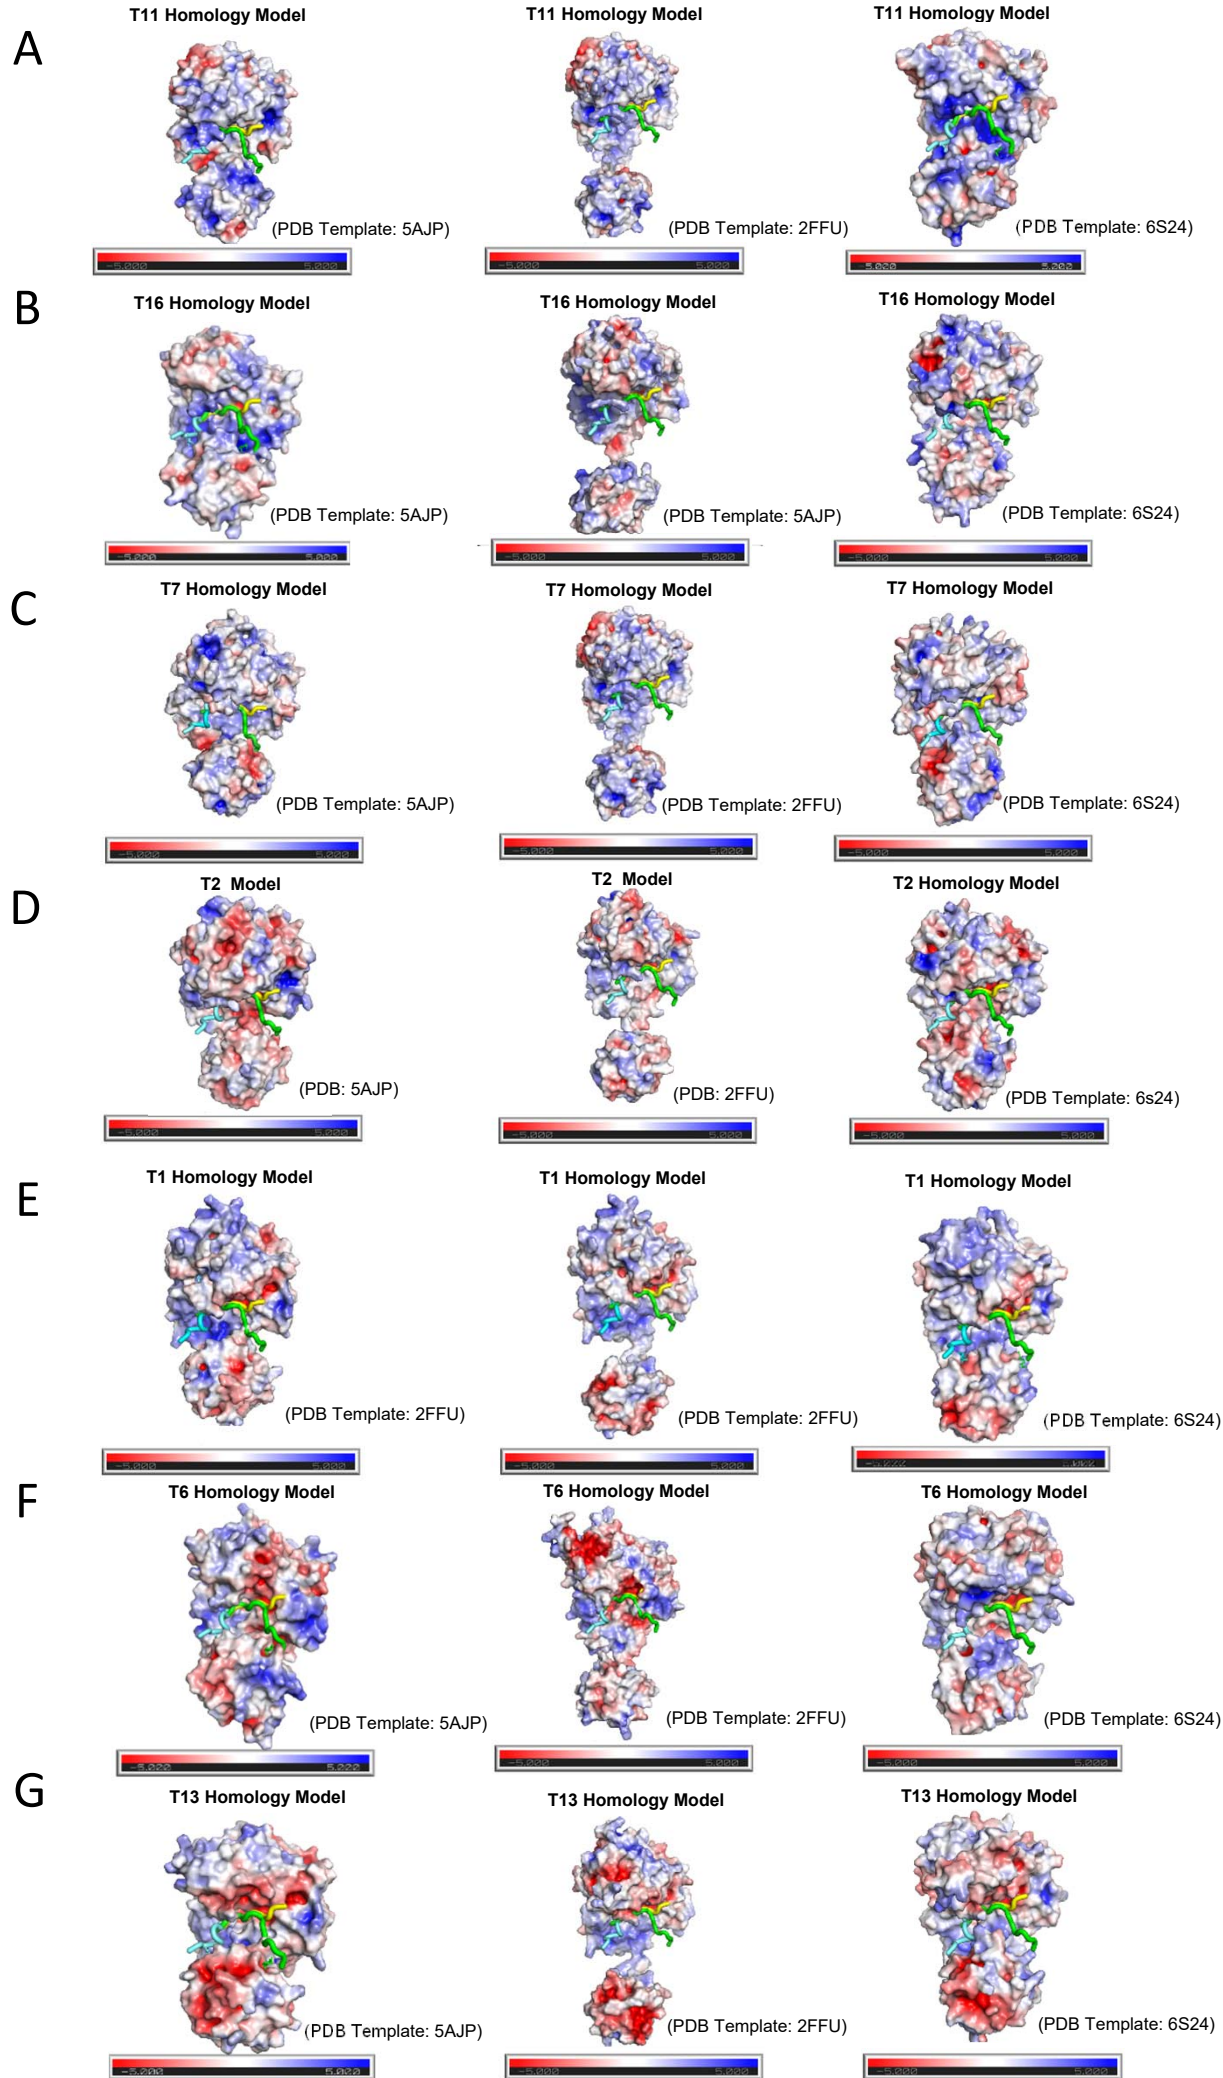



# Supplementary Figure S2: Electrostatic Surface Potentials for the GalNAc-Ts in Figure 3

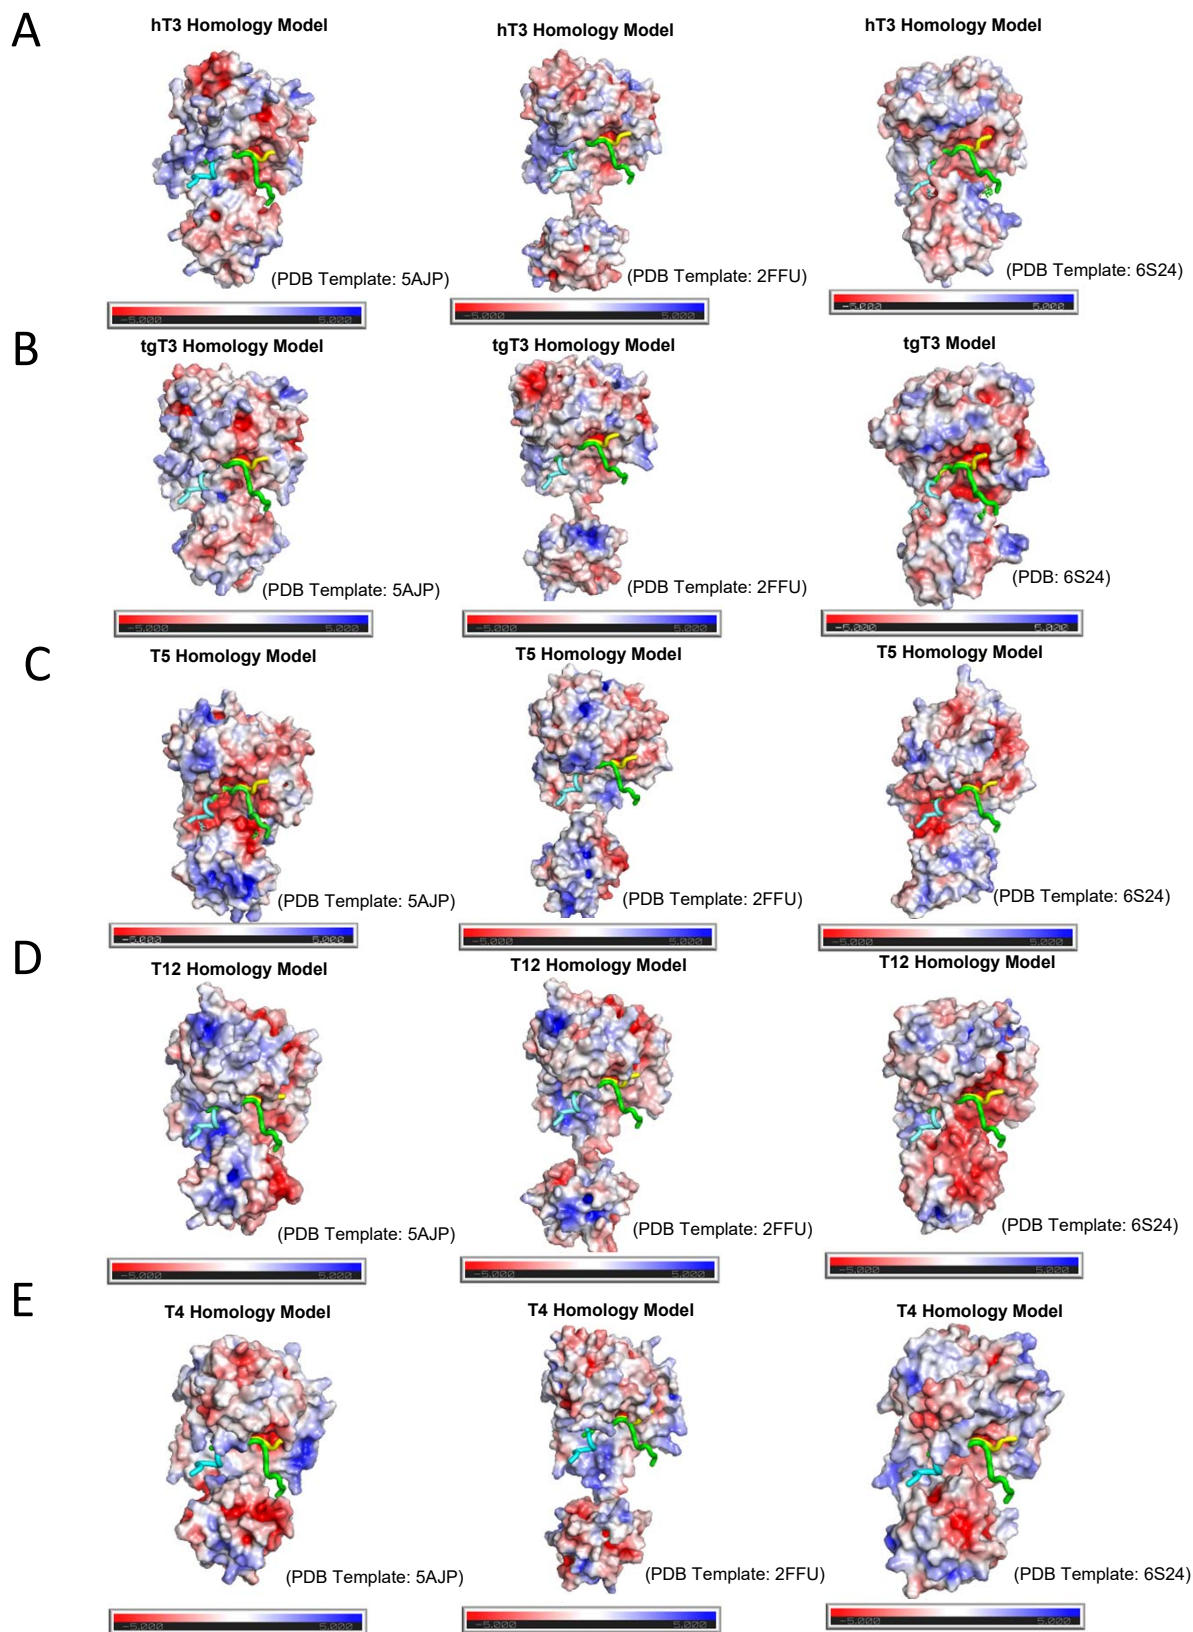



# Supplementary Figure S4: Electrostatics of the LA Repeat Regions of the LDL Receptor Reveal Defined Regions of Negative Flanking Charge

A

T11 Homology Model

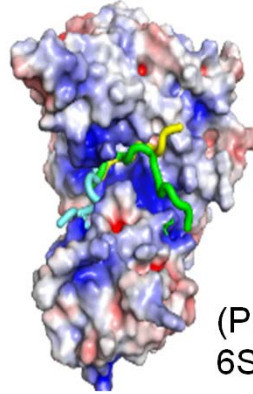

(PDB Template:  
6S24)

B

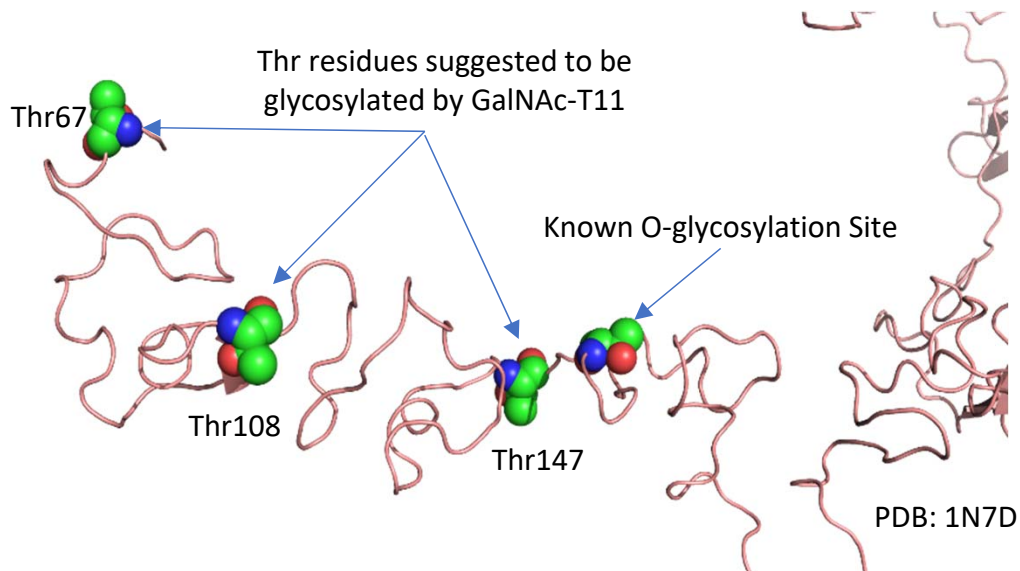

C

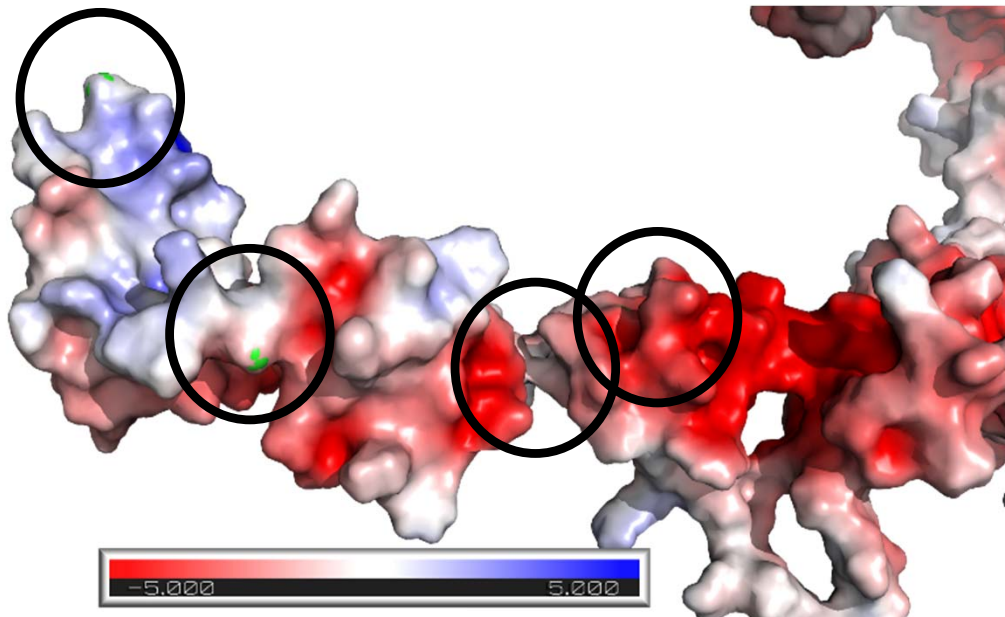

# Supplementary Figure S5: PGANT and Orthologue Surface Electrostatic Potentials

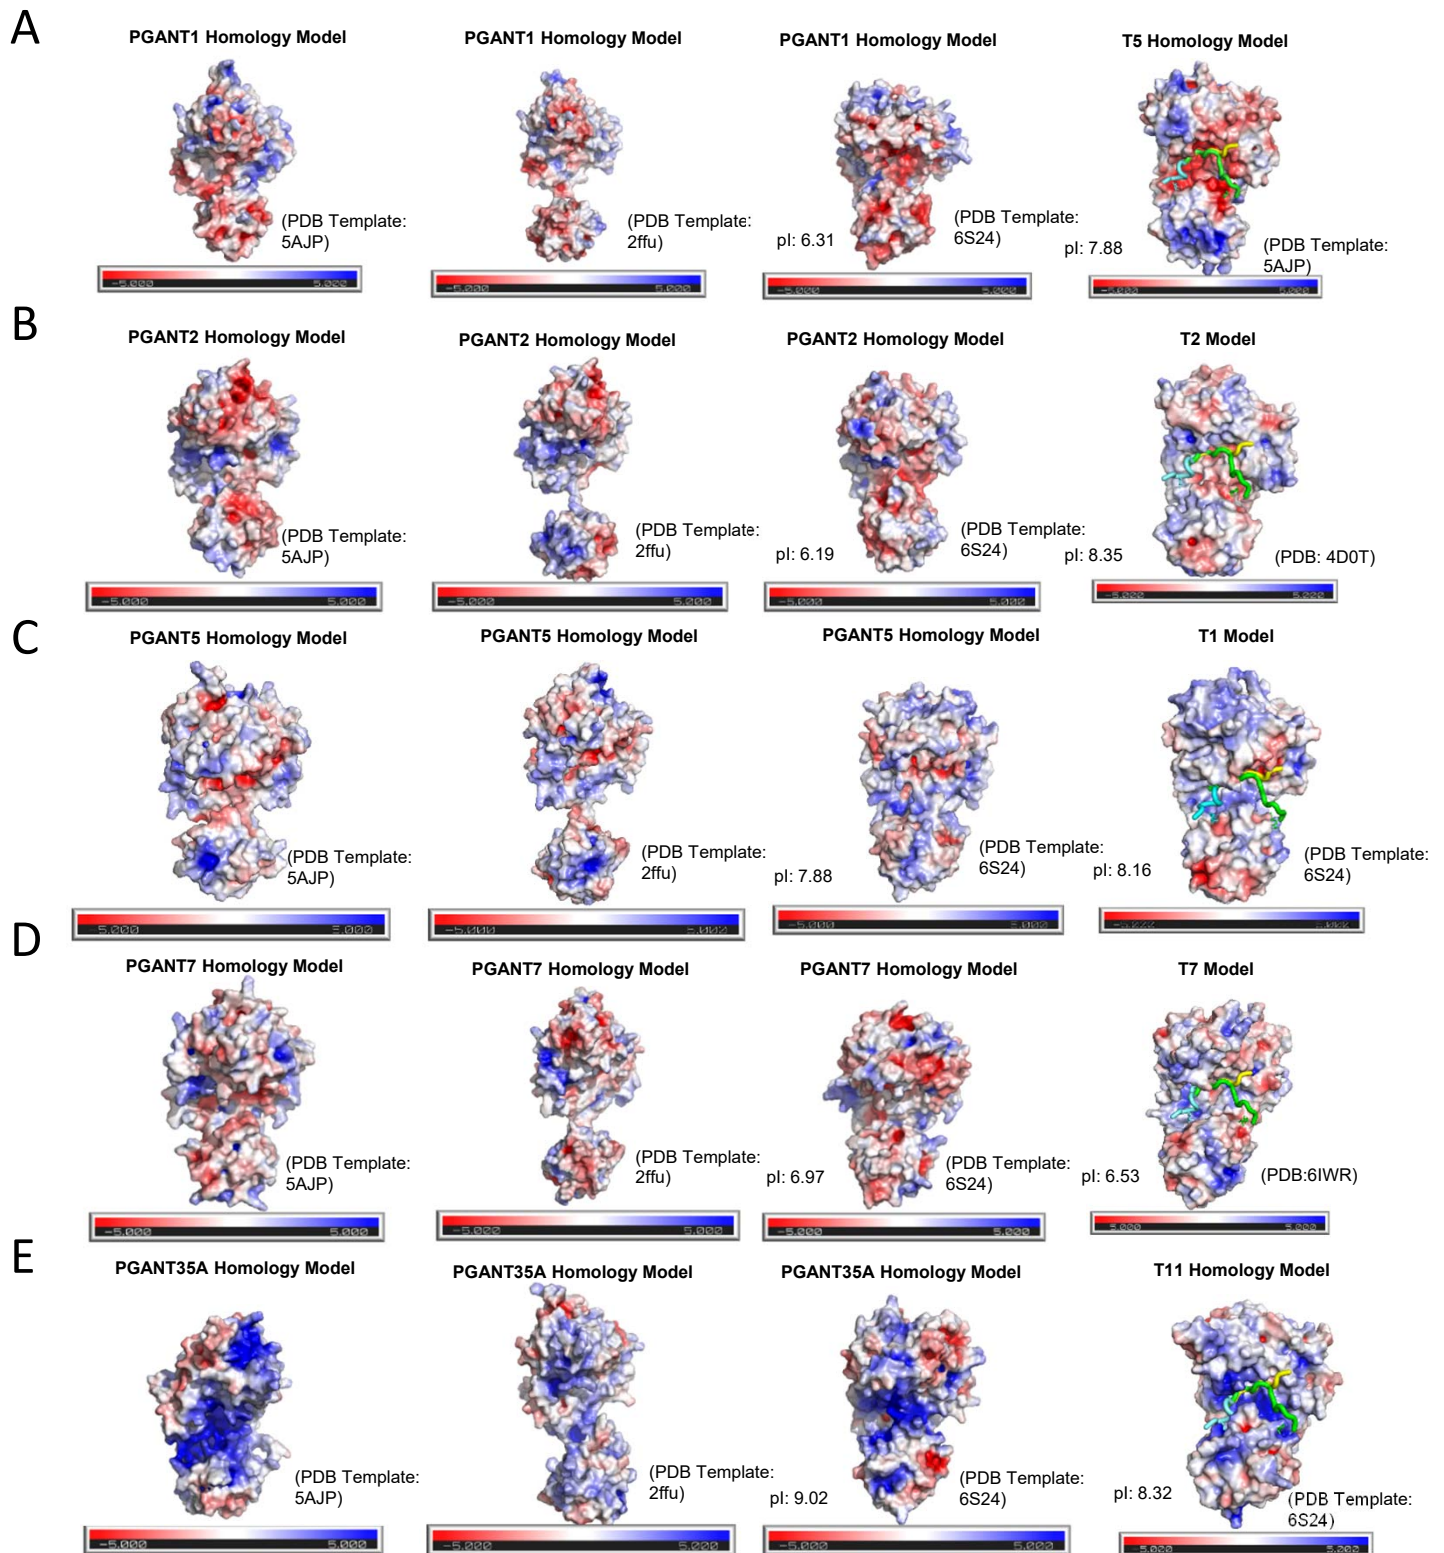

## Supplementary Figure S6:

### *In-Vivo* Reported O-Glycosylation and Reported and Predicted N-Glycosylation Sites on the Characterized GalNAc-Ts

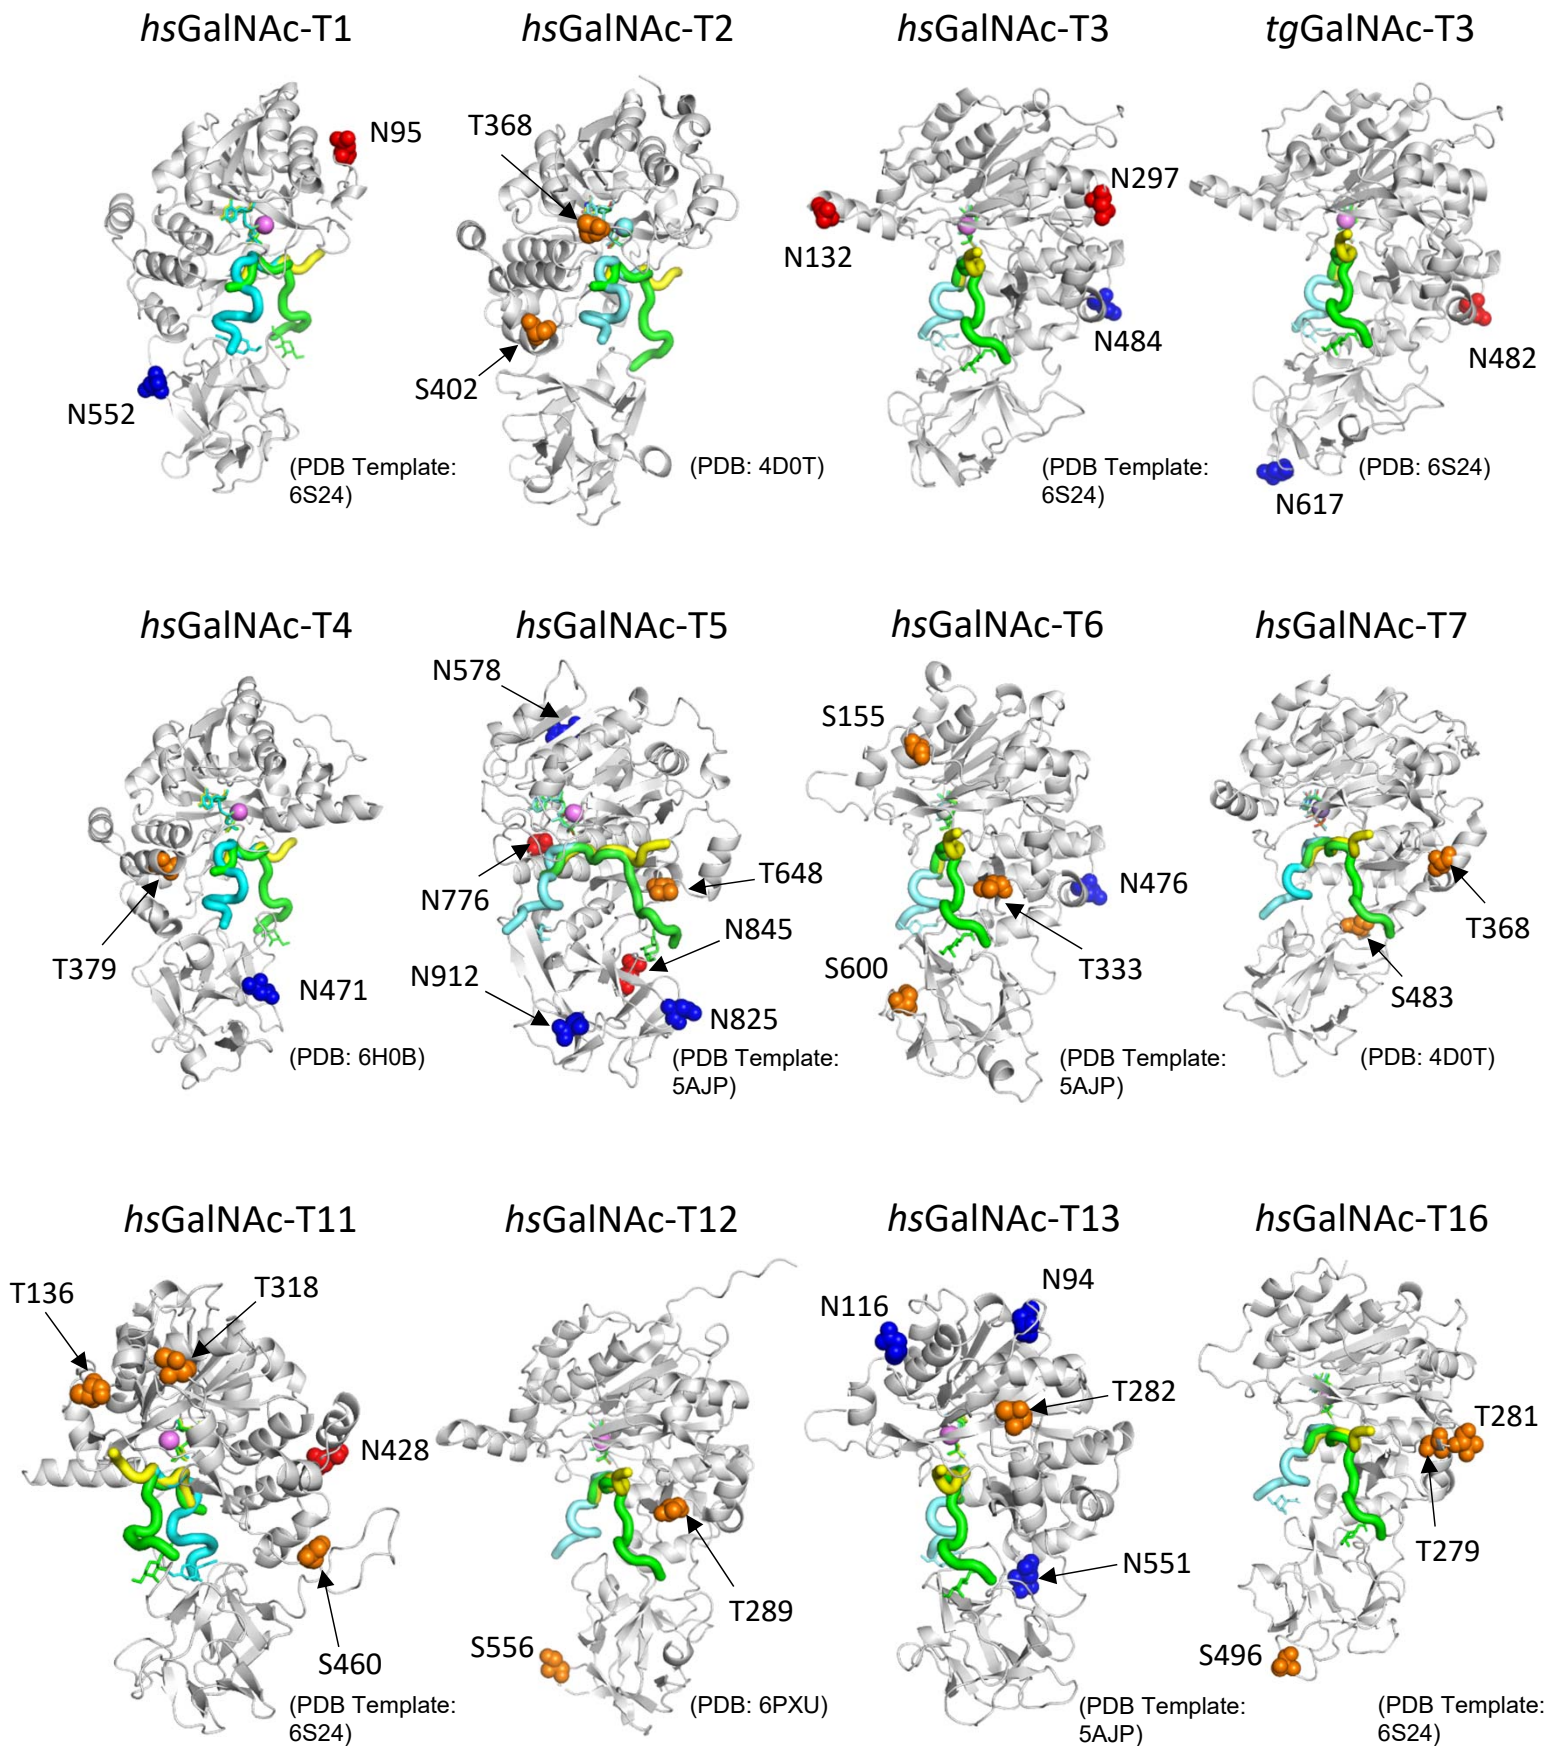



# Supplementary Fig. S7: Comparison of GalNAc-T11 and PGANT35A Specificity

A

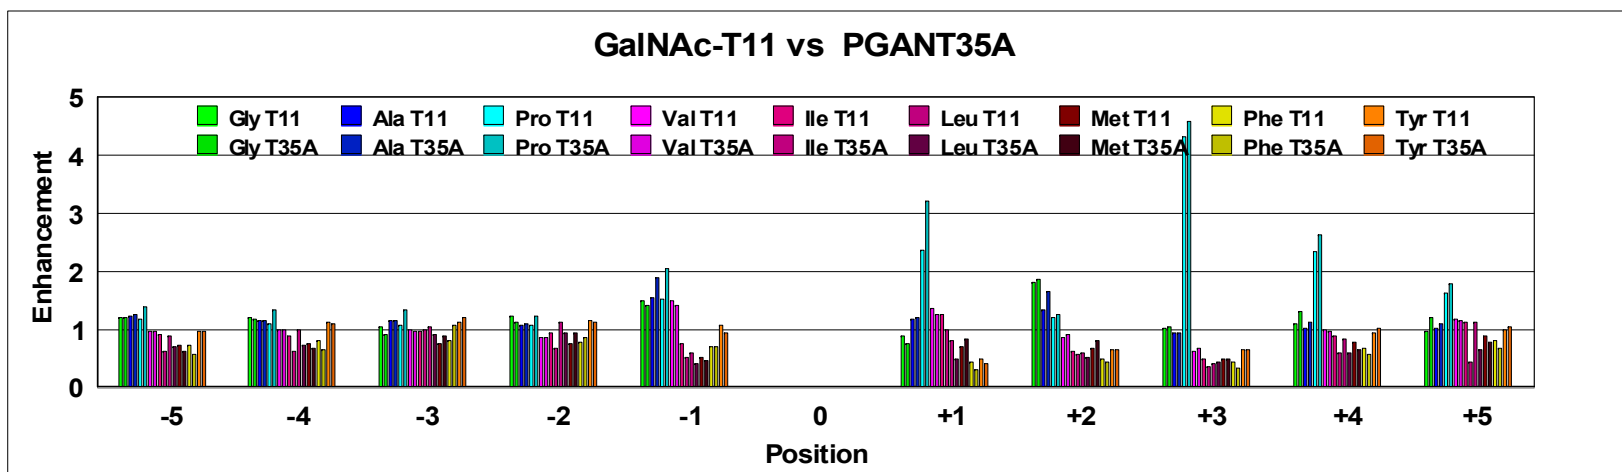

B

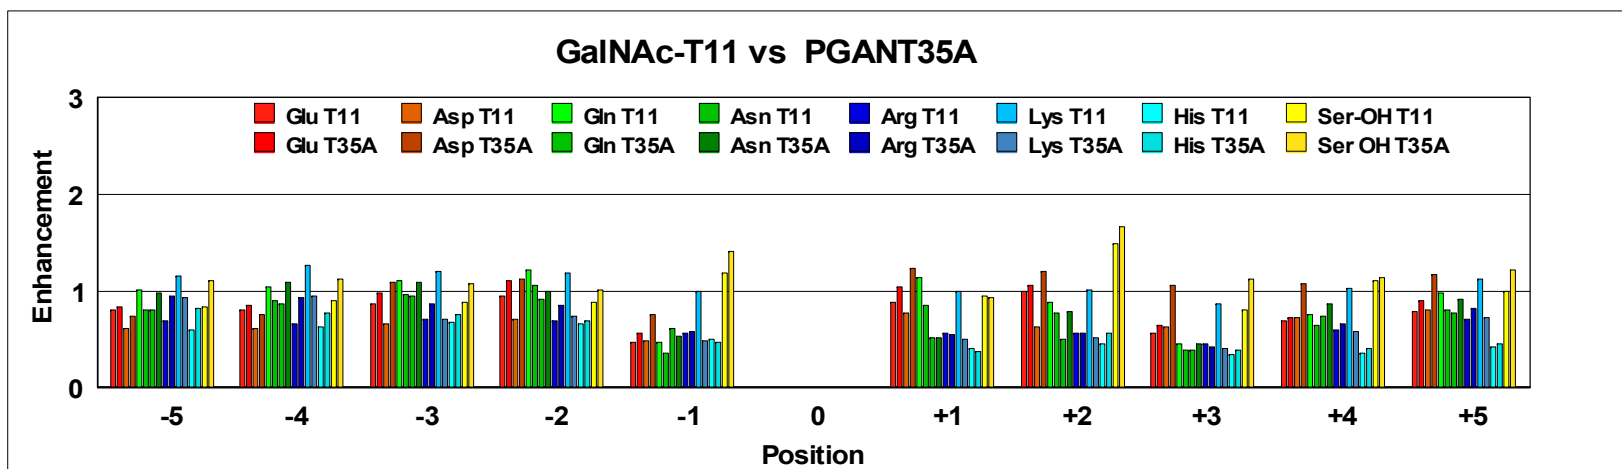

C

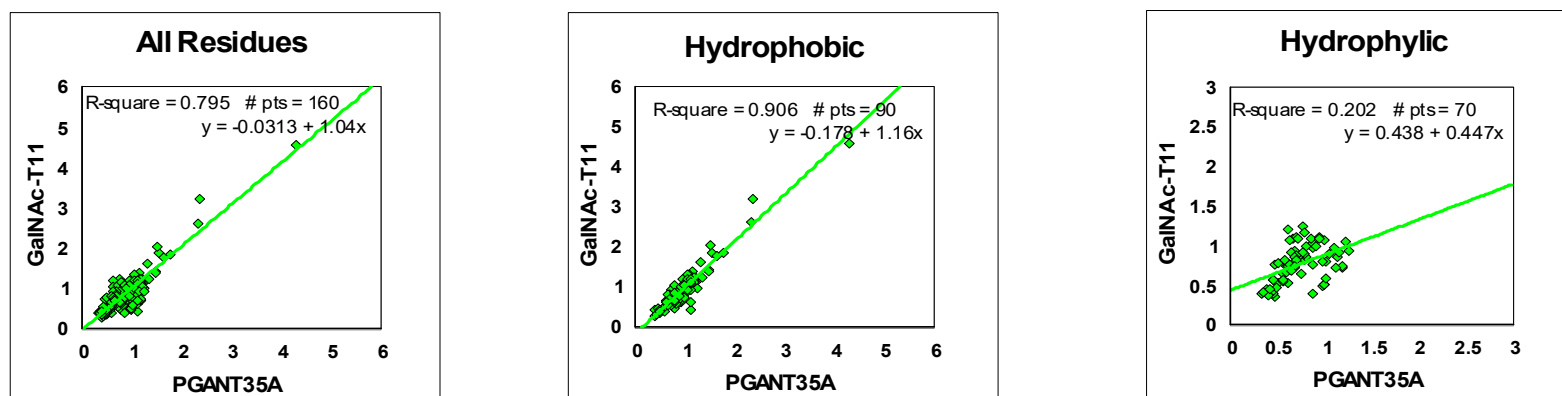

Figure S7

# Supplementary Fig. S8: Comparison of GalNAc-T3 and GalNAc-T6 Specificity

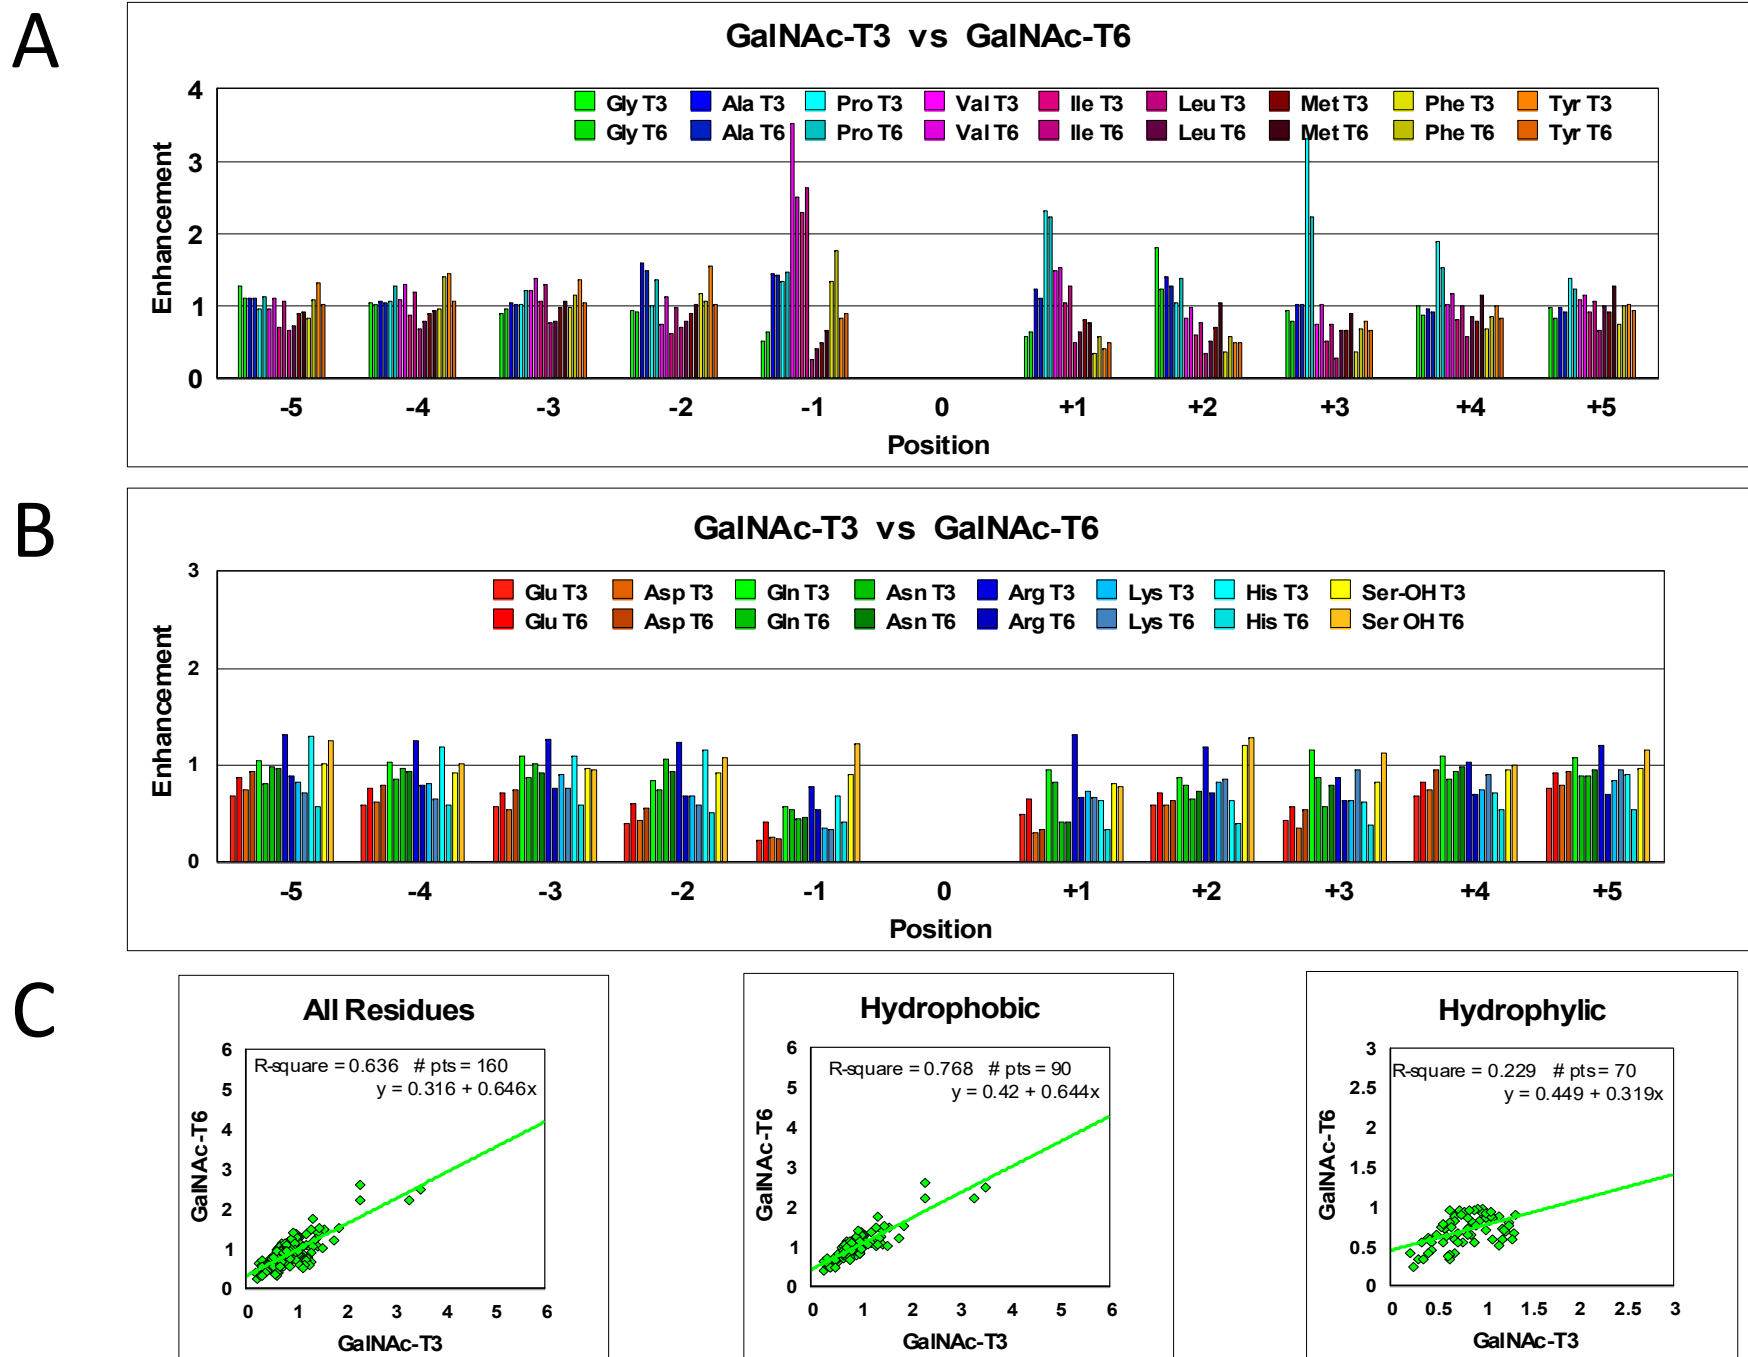

Figure S8

## Supplementary Table S1

Peptide sequences of peptides bound to GalNAc-T crystal structures in the presence of Mn<sup>2+</sup> and UDP shown in Fig 1.

| <u>GalNAc-T</u> | <u>PDB</u> | <u>Peptide</u> | <u>Sequence<sup>a</sup></u>      |
|-----------------|------------|----------------|----------------------------------|
| T2              | 2FFU       | EA2            | ST <u>T</u> PAPTTK               |
| T2              | 5AJP       | AC13           | TTP <u>S</u> PVPTTSTT*SAA        |
| T2              | 4D0Z       | mEA2           | S <u>T</u> CPAA                  |
| T3              | 6S24       | P3             | AT*GAGAGAGT <u>T</u> PGP         |
| T3              | 6S22       | FGF23c         | NT*PIPRRH <u>T</u> RSA           |
| T4              | 6H0B       | DGP6           | GAT*GAGAGAGT <u>T</u> PGPG       |
| T12             | 6PXU       | DPG-5-17       | GAGAT*GAGAGYYI <u>T</u> PRT*GAGA |

<sup>a</sup>Acceptor site underlined and in bold, T\* represents Thr-O-GalNAc.

## Supplementary Table SII

### *In-Vivo* reported and predicted N-glycosylation sites on the characterized GalNAc-Ts

| Transferase         | N-Linked Glycan Residue (Reported)    | N-Linked Glycan Residue (Predicted)                                                                                                                                                                   |
|---------------------|---------------------------------------|-------------------------------------------------------------------------------------------------------------------------------------------------------------------------------------------------------|
| <i>HsGalNAc-T1</i>  | N95 <sup>C</sup>                      | N552 <sup>L</sup>                                                                                                                                                                                     |
| <i>HsGalNAc-T2</i>  | None                                  | None                                                                                                                                                                                                  |
| <i>HsGalNAc-T3</i>  | N132 <sup>C</sup> , N297 <sup>C</sup> | N484 <sup>C</sup>                                                                                                                                                                                     |
| <i>TgGalNAc-T3</i>  | N482 <sup>C</sup>                     | N617 <sup>L</sup>                                                                                                                                                                                     |
| <i>HsGalNAc-T4</i>  | None                                  | N471 <sup>L</sup>                                                                                                                                                                                     |
| <i>HsGalNAc-T5</i>  | N776 <sup>C</sup> , N845 <sup>L</sup> | N217 <sup>S</sup> , N256 <sup>S</sup> , N273 <sup>S</sup> , N316 <sup>S</sup> , N362 <sup>S</sup> , N395 <sup>S</sup> , N406 <sup>S</sup> , N578 <sup>C</sup> , N827 <sup>L</sup> , N912 <sup>L</sup> |
| <i>HsGalNAc-T6</i>  | None                                  | N86 <sup>S</sup> , N476 <sup>C</sup>                                                                                                                                                                  |
| <i>HsGalNAc-T7</i>  | None                                  | None                                                                                                                                                                                                  |
| <i>HsGalNAc-T11</i> | N428 <sup>C</sup>                     | None                                                                                                                                                                                                  |
| <i>HsGalNAc-T12</i> | None                                  | None                                                                                                                                                                                                  |
| <i>HsGalNAc-T13</i> | None                                  | N94 <sup>C/S</sup> , N116 <sup>C</sup> , N551 <sup>L</sup>                                                                                                                                            |
| <i>HsGalNAc-T16</i> | None                                  | None                                                                                                                                                                                                  |

<sup>S</sup> Residue located on N-terminal stem.

<sup>C</sup> Residue located on catalytic domain, in red.

<sup>L</sup> Residue located on the lectin domain, in red.



## Supplementary Table SIII

### *In-Vivo* reported O-glycosylation sites on the characterized GalNAc-Ts

| Transferase         | O-Linked Glycan Residue (Reported)                                                                                                                                                                                                                                                                                                                                                                                                                                                                                                                                                                                                                                                                                                                                                                                                                                                                                                                                                                                                                                                                         |
|---------------------|------------------------------------------------------------------------------------------------------------------------------------------------------------------------------------------------------------------------------------------------------------------------------------------------------------------------------------------------------------------------------------------------------------------------------------------------------------------------------------------------------------------------------------------------------------------------------------------------------------------------------------------------------------------------------------------------------------------------------------------------------------------------------------------------------------------------------------------------------------------------------------------------------------------------------------------------------------------------------------------------------------------------------------------------------------------------------------------------------------|
| <i>HsGalNAc-T1</i>  | <b>T554<sup>L</sup></b>                                                                                                                                                                                                                                                                                                                                                                                                                                                                                                                                                                                                                                                                                                                                                                                                                                                                                                                                                                                                                                                                                    |
| <i>HsGalNAc-T2</i>  | S5 <sup>S</sup> , S29 <sup>S</sup> , S59 <sup>S</sup> , S67 <sup>S</sup> , T70 <sup>S</sup> S94 <sup>S</sup> , <b>T368<sup>Cnp</sup></b> ,<br><b>S402<sup>Cnp</sup></b>                                                                                                                                                                                                                                                                                                                                                                                                                                                                                                                                                                                                                                                                                                                                                                                                                                                                                                                                    |
| <i>HsGalNAc-T3</i>  | S124 <sup>S</sup> , T130 <sup>S</sup> , T131 <sup>S</sup>                                                                                                                                                                                                                                                                                                                                                                                                                                                                                                                                                                                                                                                                                                                                                                                                                                                                                                                                                                                                                                                  |
| <i>TgGalNAc-T3</i>  | N.D                                                                                                                                                                                                                                                                                                                                                                                                                                                                                                                                                                                                                                                                                                                                                                                                                                                                                                                                                                                                                                                                                                        |
| <i>HsGalNAc-T4</i>  | S46 <sup>S</sup> , S50 <sup>S</sup> , T56 <sup>S</sup> , S60 <sup>S</sup> , <b>T379<sup>Cnp</sup></b>                                                                                                                                                                                                                                                                                                                                                                                                                                                                                                                                                                                                                                                                                                                                                                                                                                                                                                                                                                                                      |
| <i>HsGalNAc-T5</i>  | S69 <sup>S</sup> , S70 <sup>S</sup> , T94 <sup>S</sup> , T108 <sup>S</sup> , T134 <sup>S</sup> , T138 <sup>S</sup> , T144 <sup>S</sup> ,<br>T149 <sup>S</sup> , S154 <sup>S</sup> , S155 <sup>S</sup> , S159 <sup>S</sup> , T163 <sup>S</sup> , T164 <sup>S</sup> ,<br>S172 <sup>S</sup> , S192 <sup>S</sup> , S200 <sup>S</sup> , S202 <sup>S</sup> , S204 <sup>S</sup> , S205 <sup>S</sup> ,<br>S207 <sup>S</sup> , S208 <sup>S</sup> , S221 <sup>S</sup> , T224 <sup>S</sup> , S231 <sup>S</sup> , S243 <sup>S</sup> ,<br>T244 <sup>S</sup> , S249 <sup>S</sup> , S262 <sup>S</sup> , T274 <sup>S</sup> , S275 <sup>S</sup> , T282 <sup>S</sup> ,<br>S292 <sup>S</sup> , T296 <sup>S</sup> , S300 <sup>S</sup> , S302 <sup>S</sup> , S320 <sup>S</sup> , T327 <sup>S</sup> ,<br>S356 <sup>S</sup> , S360 <sup>S</sup> , S367 <sup>S</sup> , S368 <sup>S</sup> , S369 <sup>S</sup> , S370 <sup>S</sup> ,<br>S379 <sup>S</sup> , T381 <sup>S</sup> , S402 <sup>S</sup> , S408 <sup>S</sup> , S418 <sup>S</sup> , T420 <sup>S</sup> ,<br>T429 <sup>S</sup> , S431 <sup>S</sup> , <b>T648<sup>Ccp</sup></b> |
| <i>HsGalNAc-T6</i>  | T38 <sup>S</sup> , S48 <sup>S</sup> , S67 <sup>S</sup> , T81 <sup>S</sup> , S84 <sup>S</sup> , S88 <sup>S</sup> , T95 <sup>S</sup> , S123 <sup>S</sup> ,<br><b>S155<sup>C</sup></b> , <b>T333<sup>Ccp</sup></b> , <b>S600<sup>L</sup></b>                                                                                                                                                                                                                                                                                                                                                                                                                                                                                                                                                                                                                                                                                                                                                                                                                                                                  |
| <i>HsGalNAc-T7</i>  | T29 <sup>S</sup> , S36 <sup>S</sup> , S39 <sup>S</sup> , S103 <sup>S</sup> , T114 <sup>S</sup> , T119 <sup>S</sup> , T121 <sup>S</sup> ,<br><b>T368<sup>C</sup></b> , <b>S483<sup>Cp</sup></b>                                                                                                                                                                                                                                                                                                                                                                                                                                                                                                                                                                                                                                                                                                                                                                                                                                                                                                             |
| <i>HsGalNAc-T11</i> | S45 <sup>S</sup> , S51 <sup>S</sup> , T60 <sup>S</sup> , S64 <sup>S</sup> , S96 <sup>S</sup> , <b>T136<sup>Ccp</sup></b> , <b>T318<sup>C</sup></b> ,<br><b>S460<sup>CL</sup></b>                                                                                                                                                                                                                                                                                                                                                                                                                                                                                                                                                                                                                                                                                                                                                                                                                                                                                                                           |
| <i>HsGalNAc-T12</i> | T55 <sup>S</sup> , <b>T289<sup>Ccp</sup></b> , <b>S556<sup>L</sup></b>                                                                                                                                                                                                                                                                                                                                                                                                                                                                                                                                                                                                                                                                                                                                                                                                                                                                                                                                                                                                                                     |
| <i>HsGalNAc-T13</i> | S51 <sup>S</sup> , <b>T282<sup>C</sup></b>                                                                                                                                                                                                                                                                                                                                                                                                                                                                                                                                                                                                                                                                                                                                                                                                                                                                                                                                                                                                                                                                 |
| <i>HsGalNAc-T16</i> | S34 <sup>S</sup> , S35 <sup>S</sup> , S47 <sup>S</sup> , T55 <sup>S</sup> , T61 <sup>S</sup> , T63 <sup>S</sup> , S65 <sup>S</sup> , S112 <sup>S</sup> ,<br><b>T279<sup>C</sup></b> , <b>T281<sup>C</sup></b> , <b>S496<sup>L</sup></b>                                                                                                                                                                                                                                                                                                                                                                                                                                                                                                                                                                                                                                                                                                                                                                                                                                                                    |

<sup>S</sup> Residue located on N-terminal stem.

<sup>C</sup> Residue located on catalytic domain, in red.

<sup>Cp</sup> Residue located on catalytic domain potentially affecting peptide substrate binding, in bold red.

<sup>Cnp</sup> Residue located on catalytic domain potentially affecting N-terminal substrate binding, in bold red.

<sup>Ccp</sup> Residue located on catalytic domain potentially affecting C-terminal substrate binding, in bold red.

<sup>L</sup> Residue located on the lectin domain, in red.

<sup>CL</sup> Residue located on the flexible linker connecting the catalytic and lectin domains, in red.

## **Notes for Supplementary Table SIV**

Previously unpublished enhancement values (EV) for hGalNAc-T11, PGANT35A (dT1) and hGalNAc-T6.

EV values were obtained using 3 different random peptides, PVI, PVII and PVIII as described in the Materials and methods. EV values (and their standard deviations, SD) are given for -/+ 5 residues of the acceptor site at position 0. “n” represents the number of experimental determinations obtained for each amino acid residue, which range from 2 to 21 determinations depending on transferase.

## Supplementary Table SIV: Previously Unpublished Enhancement Values

### hGalNAc-T11

| n=5-21<br>unpublished |     | POSITION |          |          |          |          |         |          |          |          |          |          |
|-----------------------|-----|----------|----------|----------|----------|----------|---------|----------|----------|----------|----------|----------|
|                       |     | EV<br>-5 | EV<br>-4 | EV<br>-3 | EV<br>-2 | EV<br>-1 | EV<br>0 | EV<br>+1 | EV<br>+2 | EV<br>+3 | EV<br>+4 | EV<br>+5 |
| <b>G</b>              | Avg | 1.20     | 1.18     | 0.92     | 1.13     | 1.42     | 0.75    | 1.86     | 1.04     | 1.30     | 1.20     |          |
|                       | SD  | 0.20     | 0.17     | 0.25     | 0.21     | 0.29     | 0.32    | 0.31     | 0.29     | 0.24     | 0.21     |          |
| <b>A</b>              | Avg | 1.25     | 1.14     | 1.15     | 1.09     | 1.88     | 1.21    | 1.64     | 0.93     | 1.12     | 1.10     |          |
|                       | SD  | 0.14     | 0.10     | 0.16     | 0.13     | 0.35     | 0.23    | 0.43     | 0.23     | 0.11     | 0.15     |          |
| <b>P</b>              | Avg | 1.39     | 1.33     | 1.34     | 1.22     | 2.06     | 3.22    | 1.26     | 4.58     | 2.62     | 1.79     |          |
|                       | SD  | 0.31     | 0.26     | 0.29     | 0.28     | 0.63     | 0.88    | 0.18     | 1.14     | 0.59     | 0.25     |          |
| <b>V</b>              | Avg | 0.96     | 0.99     | 0.96     | 0.87     | 1.40     | 1.26    | 0.91     | 0.67     | 0.96     | 1.14     |          |
|                       | SD  | 0.06     | 0.07     | 0.16     | 0.10     | 0.23     | 0.18    | 0.11     | 0.14     | 0.11     | 0.15     |          |
| <b>I</b>              | Avg | 0.62     | 0.62     | 0.99     | 0.68     | 0.51     | 1.00    | 0.57     | 0.35     | 0.60     | 0.44     |          |
|                       | SD  | 0.11     | 0.08     | 0.53     | 0.12     | 0.10     | 0.21    | 0.19     | 0.07     | 0.05     | 0.37     |          |
| <b>L</b>              | Avg | 0.70     | 0.74     | 0.92     | 0.94     | 0.41     | 0.49    | 0.51     | 0.45     | 0.61     | 0.64     |          |
|                       | SD  | 0.11     | 0.10     | 0.23     | 0.24     | 0.13     | 0.07    | 0.12     | 0.30     | 0.10     | 0.40     |          |
| <b>M</b>              | Avg | 0.63     | 0.67     | 0.88     | 0.93     | 0.45     | 0.84    | 0.82     | 0.49     | 0.65     | 0.78     |          |
|                       | SD  | 0.05     | 0.06     | 0.21     | 0.25     | 0.08     | 0.20    | 0.28     | 0.15     | 0.05     | 0.06     |          |
| <b>F</b>              | Avg | 0.57     | 0.64     | 1.07     | 0.87     | 0.70     | 0.29    | 0.44     | 0.32     | 0.57     | 0.68     |          |
|                       | SD  | 0.14     | 0.11     | 0.53     | 0.40     | 0.26     | 0.09    | 0.18     | 0.07     | 0.10     | 0.14     |          |
| <b>Y</b>              | Avg | 0.97     | 1.09     | 1.21     | 1.12     | 0.94     | 0.41    | 0.65     | 0.65     | 1.01     | 1.04     |          |
|                       | SD  | 0.17     | 0.20     | 0.24     | 0.22     | 0.16     | 0.13    | 0.17     | 0.21     | 0.08     | 0.08     |          |
| <b>E</b>              | Avg | 0.83     | 0.86     | 0.98     | 1.10     | 0.57     | 1.04    | 1.07     | 0.65     | 0.73     | 0.90     |          |
|                       | SD  | 0.14     | 0.15     | 0.36     | 0.37     | 0.37     | 0.33    | 0.33     | 0.33     | 0.15     | 0.20     |          |
| <b>D</b>              | Avg | 0.74     | 0.75     | 1.10     | 1.12     | 0.76     | 1.24    | 1.20     | 1.07     | 1.08     | 1.17     |          |
|                       | SD  | 0.13     | 0.12     | 0.41     | 0.32     | 0.31     | 0.44    | 0.37     | 0.39     | 0.42     | 0.42     |          |
| <b>Q</b>              | Avg | 0.80     | 0.89     | 0.97     | 1.06     | 0.36     | 0.86    | 0.77     | 0.40     | 0.65     | 0.81     |          |
|                       | SD  | 0.19     | 0.22     | 0.20     | 0.20     | 0.13     | 0.18    | 0.15     | 0.06     | 0.09     | 0.18     |          |
| <b>N</b>              | Avg | 0.99     | 1.09     | 1.09     | 1.00     | 0.54     | 0.52    | 0.79     | 0.45     | 0.88     | 0.92     |          |
|                       | SD  | 0.17     | 0.16     | 0.17     | 0.16     | 0.13     | 0.13    | 0.13     | 0.05     | 0.07     | 0.06     |          |
| <b>R</b>              | Avg | 0.95     | 0.93     | 0.87     | 0.85     | 0.58     | 0.54    | 0.57     | 0.43     | 0.67     | 0.82     |          |
|                       | SD  | 0.44     | 0.36     | 0.34     | 0.27     | 0.21     | 0.18    | 0.15     | 0.16     | 0.12     | 0.13     |          |
| <b>K</b>              | Avg | 0.93     | 0.94     | 0.72     | 0.74     | 0.49     | 0.51    | 0.52     | 0.41     | 0.59     | 0.72     |          |
|                       | SD  | 0.27     | 0.30     | 0.35     | 0.27     | 0.30     | 0.28    | 0.26     | 0.25     | 0.30     | 0.29     |          |
| <b>H</b>              | Avg | 0.82     | 0.77     | 0.75     | 0.70     | 0.47     | 0.37    | 0.57     | 0.39     | 0.41     | 0.46     |          |
|                       | SD  | 0.28     | 0.20     | 0.15     | 0.13     | 0.13     | 0.13    | 0.13     | 0.10     | 0.09     | 0.09     |          |
| <b>S</b>              | Avg | 1.19     | 1.19     | 1.22     | 1.15     | 1.50     | 1.27    | 1.81     | 1.30     | 1.24     | 1.32     |          |
|                       | SD  | 0.13     | 0.10     | 0.13     | 0.13     | 0.11     | 0.36    | 0.28     | 0.19     | 0.11     | 0.14     |          |

## Supplementary Table SIV continued:

| <b>PGANT35A (dT1)</b>   |     | <b>POSITION</b> |           |           |           |           |           |           |           |           |           |           |
|-------------------------|-----|-----------------|-----------|-----------|-----------|-----------|-----------|-----------|-----------|-----------|-----------|-----------|
| <b>n=2-6</b>            |     | <b>EV</b>       | <b>EV</b> | <b>EV</b> | <b>EV</b> | <b>EV</b> | <b>EV</b> | <b>EV</b> | <b>EV</b> | <b>EV</b> | <b>EV</b> |           |
| <b>Ref: unpublished</b> |     | <b>-5</b>       | <b>-4</b> | <b>-3</b> | <b>-2</b> | <b>-1</b> | <b>0</b>  | <b>+1</b> | <b>+2</b> | <b>+3</b> | <b>+4</b> | <b>+5</b> |
| <b>G</b>                | Avg | 1.20            | 1.19      | 1.06      | 1.22      | 1.50      |           | 0.88      | 1.80      | 1.03      | 1.10      | 0.98      |
|                         | SD  | 0.16            | 0.11      | 0.15      | 0.10      | 0.22      |           | 0.15      | 0.26      | 0.11      | 0.10      | 0.12      |
| <b>A</b>                | Avg | 1.24            | 1.15      | 1.16      | 1.06      | 1.54      |           | 1.17      | 1.33      | 0.94      | 1.02      | 1.02      |
|                         | SD  | 0.12            | 0.08      | 0.10      | 0.06      | 0.24      |           | 0.05      | 0.10      | 0.03      | 0.04      | 0.04      |
| <b>P</b>                | Avg | 1.17            | 1.11      | 1.07      | 1.07      | 1.51      |           | 2.36      | 1.20      | 4.32      | 2.33      | 1.64      |
|                         | SD  | 0.33            | 0.25      | 0.19      | 0.20      | 0.29      |           | 0.48      | 0.11      | 1.18      | 0.50      | 0.27      |
| <b>V</b>                | Avg | 0.96            | 1.00      | 1.00      | 0.85      | 1.48      |           | 1.37      | 0.85      | 0.63      | 1.00      | 1.18      |
|                         | SD  | 0.06            | 0.11      | 0.11      | 0.08      | 0.40      |           | 0.16      | 0.09      | 0.05      | 0.19      | 0.19      |
| <b>I</b>                | Avg | 0.92            | 0.88      | 0.96      | 0.93      | 0.75      |           | 1.26      | 0.62      | 0.50      | 0.88      | 1.12      |
|                         | SD  | 0.01            | 0.00      | 0.02      | 0.01      | 0.02      |           | 0.14      | 0.01      | 0.02      | 0.05      | 0.02      |
| <b>L</b>                | Avg | 0.90            | 1.00      | 1.04      | 1.12      | 0.60      |           | 0.79      | 0.59      | 0.42      | 0.83      | 1.13      |
|                         | SD  | 0.04            | 0.01      | 0.02      | 0.01      | 0.08      |           | 0.04      | 0.08      | 0.09      | 0.08      | 0.08      |
| <b>M</b>                | Avg | 0.72            | 0.75      | 0.76      | 0.75      | 0.51      |           | 0.69      | 0.66      | 0.48      | 0.77      | 0.89      |
|                         | SD  | 0.01            | 0.01      | 0.00      | 0.00      | 0.01      |           | 0.03      | 0.01      | 0.02      | 0.02      | 0.04      |
| <b>F</b>                | Avg | 0.74            | 0.82      | 0.80      | 0.79      | 0.69      |           | 0.43      | 0.50      | 0.44      | 0.67      | 0.81      |
|                         | SD  | 0.01            | 0.01      | 0.01      | 0.00      | 0.02      |           | 0.01      | 0.02      | 0.03      | 0.04      | 0.01      |
| <b>Y</b>                | Avg | 0.98            | 1.13      | 1.12      | 1.14      | 1.07      |           | 0.50      | 0.65      | 0.65      | 0.94      | 1.00      |
|                         | SD  | 0.10            | 0.12      | 0.10      | 0.06      | 0.16      |           | 0.02      | 0.05      | 0.11      | 0.10      | 0.07      |
| <b>E</b>                | Avg | 0.80            | 0.81      | 0.88      | 0.95      | 0.46      |           | 0.88      | 1.00      | 0.56      | 0.69      | 0.80      |
|                         | SD  | 0.15            | 0.13      | 0.09      | 0.04      | 0.07      |           | 0.07      | 0.04      | 0.04      | 0.03      | 0.04      |
| <b>D</b>                | Avg | 0.61            | 0.62      | 0.66      | 0.71      | 0.48      |           | 0.78      | 0.62      | 0.63      | 0.72      | 0.80      |
|                         | SD  | 0.03            | 0.01      | 0.01      | 0.02      | 0.04      |           | 0.02      | 0.01      | 0.05      | 0.01      | 0.03      |
| <b>Q</b>                | Avg | 1.02            | 1.05      | 1.11      | 1.23      | 0.48      |           | 1.14      | 0.88      | 0.46      | 0.75      | 0.98      |
|                         | SD  | 0.12            | 0.09      | 0.07      | 0.04      | 0.00      |           | 0.05      | 0.00      | 0.01      | 0.01      | 0.04      |
| <b>N</b>                | Avg | 0.81            | 0.87      | 0.96      | 0.92      | 0.61      |           | 0.52      | 0.51      | 0.38      | 0.75      | 0.77      |
|                         | SD  | 0.06            | 0.07      | 0.04      | 0.09      | 0.01      |           | 0.01      | 0.03      | 0.03      | 0.02      | 0.02      |
| <b>R</b>                | Avg | 0.69            | 0.66      | 0.71      | 0.70      | 0.57      |           | 0.56      | 0.57      | 0.46      | 0.59      | 0.71      |
|                         | SD  | 0.15            | 0.14      | 0.14      | 0.15      | 0.13      |           | 0.13      | 0.14      | 0.18      | 0.14      | 0.15      |
| <b>K</b>                | Avg | 1.16            | 1.27      | 1.20      | 1.19      | 0.99      |           | 1.00      | 1.01      | 0.87      | 1.03      | 1.13      |
|                         | SD  | 0.08            | 0.09      | 0.13      | 0.14      | 0.22      |           | 0.18      | 0.15      | 0.15      | 0.12      | 0.10      |
| <b>H</b>                | Avg | 0.59            | 0.64      | 0.68      | 0.66      | 0.50      |           | 0.41      | 0.46      | 0.34      | 0.36      | 0.43      |
|                         | SD  | 0.10            | 0.12      | 0.12      | 0.14      | 0.06      |           | 0.05      | 0.06      | 0.02      | 0.03      | 0.06      |
| <b>S</b>                | Avg | 0.83            | 0.90      | 0.89      | 0.89      | 1.18      |           | 0.95      | 1.48      | 0.81      | 1.11      | 0.99      |
|                         | SD  | 0.01            | 0.05      | 0.05      | 0.06      | 0.07      |           | 0.09      | 0.09      | 0.05      | 0.15      | 0.09      |

## Supplementary Table SIV continued:

### hGalNAc-T6

| n=2-11           |     | POSITION |      |      |      |      |      |      |      |      |      |    |
|------------------|-----|----------|------|------|------|------|------|------|------|------|------|----|
| Ref: unpublished |     | EV       | EV   | EV   | EV   | EV   | EV   | EV   | EV   | EV   | EV   |    |
|                  |     | -5       | -4   | -3   | -2   | -1   | 0    | +1   | +2   | +3   | +4   | +5 |
| <b>G</b>         | Avg | 1.12     | 1.03 | 0.96 | 0.93 | 0.65 | 0.65 | 1.23 | 0.80 | 0.87 | 0.83 |    |
|                  | SD  | 0.08     | 0.07 | 0.05 | 0.12 | 0.11 | 0.17 | 0.16 | 0.20 | 0.19 | 0.19 |    |
| <b>A</b>         | Avg | 1.11     | 1.04 | 1.03 | 1.50 | 1.42 | 1.10 | 1.28 | 1.03 | 0.92 | 0.91 |    |
|                  | SD  | 0.13     | 0.07 | 0.12 | 0.23 | 0.15 | 0.08 | 0.08 | 0.15 | 0.15 | 0.12 |    |
| <b>P</b>         | Avg | 1.12     | 1.27 | 1.22 | 1.37 | 1.48 | 2.23 | 1.38 | 2.22 | 1.53 | 1.23 |    |
|                  | SD  | 0.10     | 0.15 | 0.09 | 0.09 | 0.32 | 0.53 | 0.15 | 0.35 | 0.17 | 0.21 |    |
| <b>V</b>         | Avg | 1.12     | 1.30 | 1.38 | 1.13 | 2.50 | 1.53 | 0.98 | 1.03 | 1.17 | 1.15 |    |
|                  | SD  | 0.11     | 0.12 | 0.17 | 0.19 | 0.21 | 0.21 | 0.10 | 0.11 | 0.11 | 0.09 |    |
| <b>I</b>         | Avg | 1.07     | 1.19 | 1.30 | 0.99 | 2.63 | 1.28 | 0.77 | 0.76 | 1.01 | 1.07 |    |
|                  | SD  | 0.12     | 0.03 | 0.04 | 0.06 | 0.35 | 0.16 | 0.18 | 0.08 | 0.09 | 0.08 |    |
| <b>L</b>         | Avg | 0.72     | 0.79 | 0.80 | 0.79 | 0.41 | 0.64 | 0.52 | 0.66 | 0.85 | 1.01 |    |
|                  | SD  | 0.17     | 0.14 | 0.15 | 0.14 | 0.06 | 0.11 | 0.04 | 0.10 | 0.19 | 0.26 |    |
| <b>M</b>         | Avg | 0.93     | 0.94 | 1.07 | 1.02 | 0.67 | 0.77 | 1.05 | 0.90 | 1.15 | 1.27 |    |
|                  | SD  | 0.11     | 0.04 | 0.12 | 0.14 | 0.17 | 0.16 | 0.19 | 0.19 | 0.30 | 0.36 |    |
| <b>F</b>         | Avg | 1.09     | 1.40 | 1.15 | 1.07 | 1.76 | 0.58 | 0.58 | 0.70 | 0.85 | 1.00 |    |
|                  | SD  | 0.06     | 0.31 | 0.09 | 0.04 | 0.16 | 0.04 | 0.05 | 0.03 | 0.04 | 0.03 |    |
| <b>Y</b>         | Avg | 1.04     | 1.07 | 1.05 | 1.02 | 0.89 | 0.49 | 0.49 | 0.66 | 0.84 | 0.93 |    |
|                  | SD  | 0.14     | 0.14 | 0.12 | 0.11 | 0.04 | 0.05 | 0.09 | 0.12 | 0.08 | 0.11 |    |
| <b>E</b>         | Avg | 0.88     | 0.77 | 0.72 | 0.61 | 0.42 | 0.65 | 0.72 | 0.58 | 0.83 | 0.93 |    |
|                  | SD  | 0.19     | 0.14 | 0.11 | 0.14 | 0.12 | 0.14 | 0.11 | 0.11 | 0.14 | 0.16 |    |
| <b>D</b>         | Avg | 0.94     | 0.80 | 0.75 | 0.56 | 0.24 | 0.34 | 0.63 | 0.55 | 0.95 | 0.94 |    |
|                  | SD  | 0.12     | 0.09 | 0.11 | 0.08 | 0.07 | 0.07 | 0.07 | 0.09 | 0.07 | 0.07 |    |
| <b>Q</b>         | Avg | 0.81     | 0.85 | 0.87 | 0.75 | 0.54 | 0.83 | 0.80 | 0.88 | 0.85 | 0.89 |    |
|                  | SD  | 0.19     | 0.17 | 0.17 | 0.05 | 0.09 | 0.07 | 0.06 | 0.23 | 0.19 | 0.12 |    |
| <b>N</b>         | Avg | 0.97     | 0.94 | 0.93 | 0.93 | 0.46 | 0.42 | 0.74 | 0.79 | 0.99 | 0.96 |    |
|                  | SD  | 0.07     | 0.08 | 0.05 | 0.08 | 0.02 | 0.04 | 0.06 | 0.05 | 0.08 | 0.04 |    |
| <b>R</b>         | Avg | 0.89     | 0.80 | 0.77 | 0.68 | 0.54 | 0.68 | 0.72 | 0.64 | 0.70 | 0.70 |    |
|                  | SD  | 0.51     | 0.45 | 0.38 | 0.27 | 0.18 | 0.19 | 0.14 | 0.16 | 0.16 | 0.14 |    |
| <b>K</b>         | Avg | 0.72     | 0.66 | 0.77 | 0.59 | 0.34 | 0.66 | 0.86 | 0.95 | 0.91 | 0.96 |    |
|                  | SD  | 0.05     | 0.06 | 0.04 | 0.05 | 0.09 | 0.09 | 0.14 | 0.14 | 0.14 | 0.21 |    |
| <b>H</b>         | Avg | 0.58     | 0.58 | 0.60 | 0.52 | 0.42 | 0.33 | 0.40 | 0.38 | 0.55 | 0.54 |    |
|                  | SD  | 0.11     | 0.10 | 0.10 | 0.12 | 0.09 | 0.08 | 0.05 | 0.05 | 0.10 | 0.07 |    |
| <b>S</b>         | Avg | 1.25     | 1.03 | 0.96 | 1.08 | 1.22 | 0.78 | 1.28 | 1.13 | 1.01 | 1.16 |    |
|                  | SD  | 0.23     | 0.02 | 0.18 | 0.09 | 0.21 | 0.09 | 0.06 | 0.10 | 0.05 | 0.19 |    |
